# Supplementary material for: Ph3P-mediated decarboxylative ring-opening of maleic anhydride by thiolic compounds: formation of two carbon–sulfur bonds
Source: Royal Society of Chemistry journal article supplement (doi:10.1039/d3ra00294b), 2023-01-01

## Supporting Information

### **Ph<sub>3</sub>P-mediated decarboxylative ring-opening of maleic anhydride by thiolic compounds: Formation of two carbon-sulfur bonds**

Najmeh Nowrouzi,<sup>\*a</sup> Mohammad Abbasi <sup>a</sup> and Zeinab Zellifard <sup>a</sup>

<sup>a</sup> Department of Chemistry, Faculty of Nano and Bio Science and Technology, Persian Gulf University, Bushehr 75169 Iran Address here

\*E-mail address: [nowrouzi@pgu.ac.ir](mailto:nowrouzi@pgu.ac.ir).

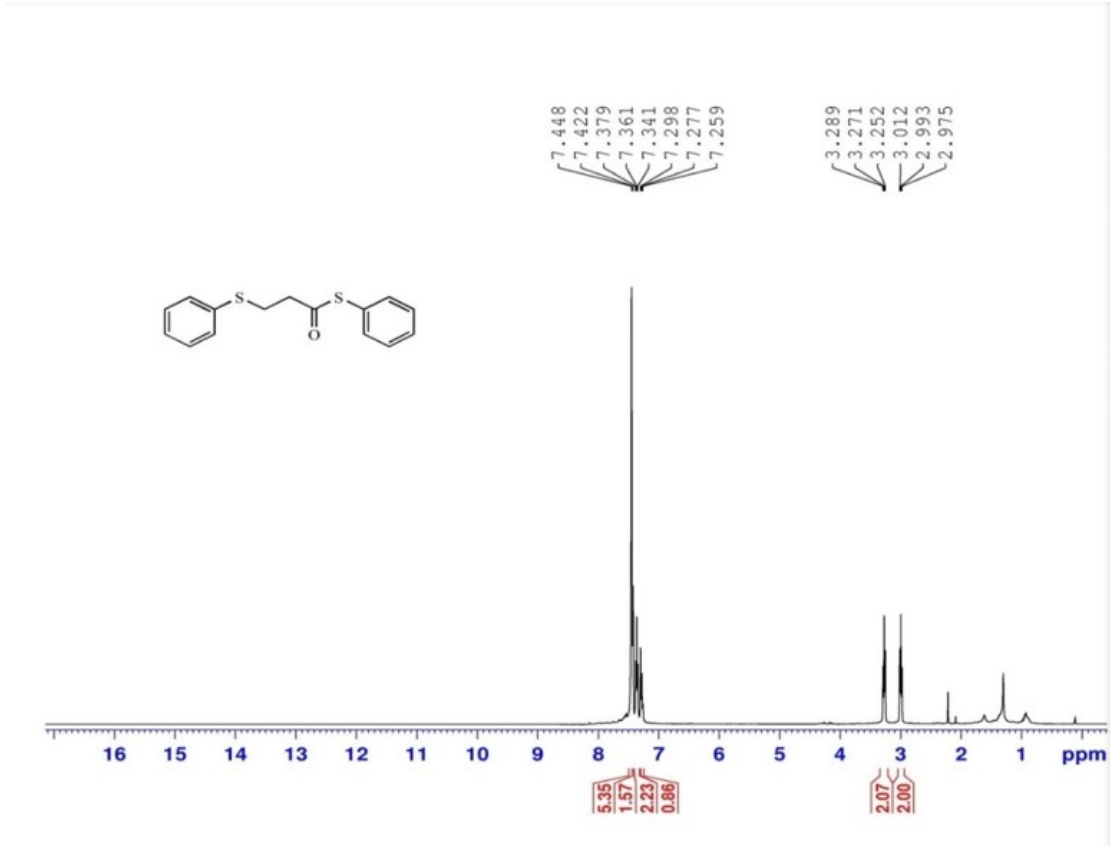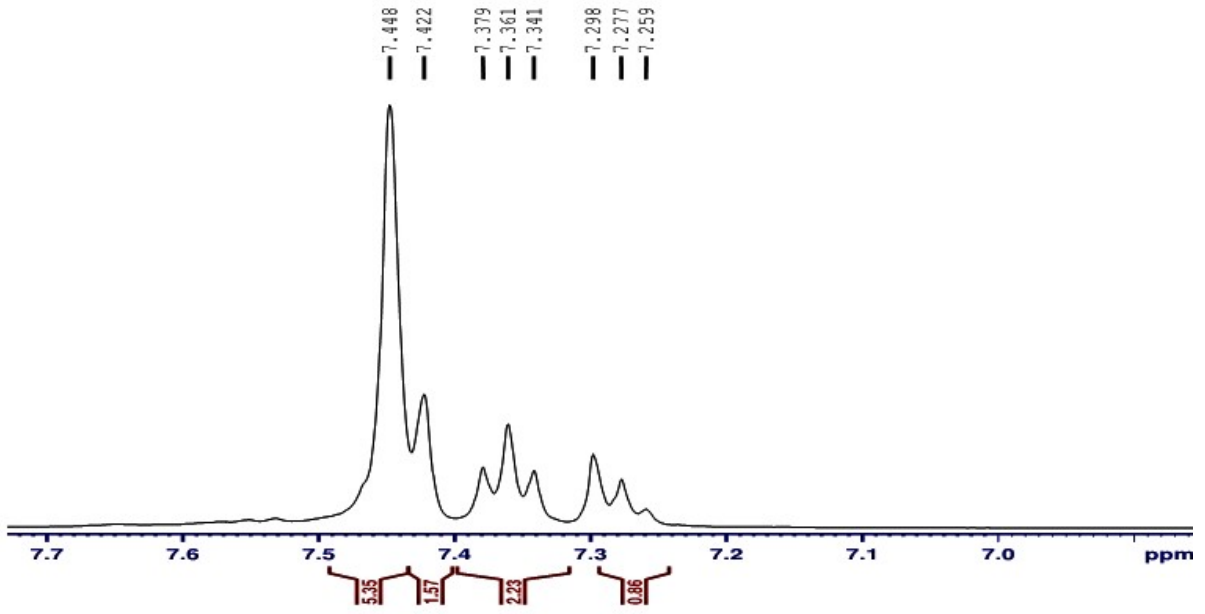

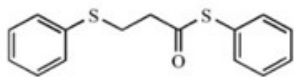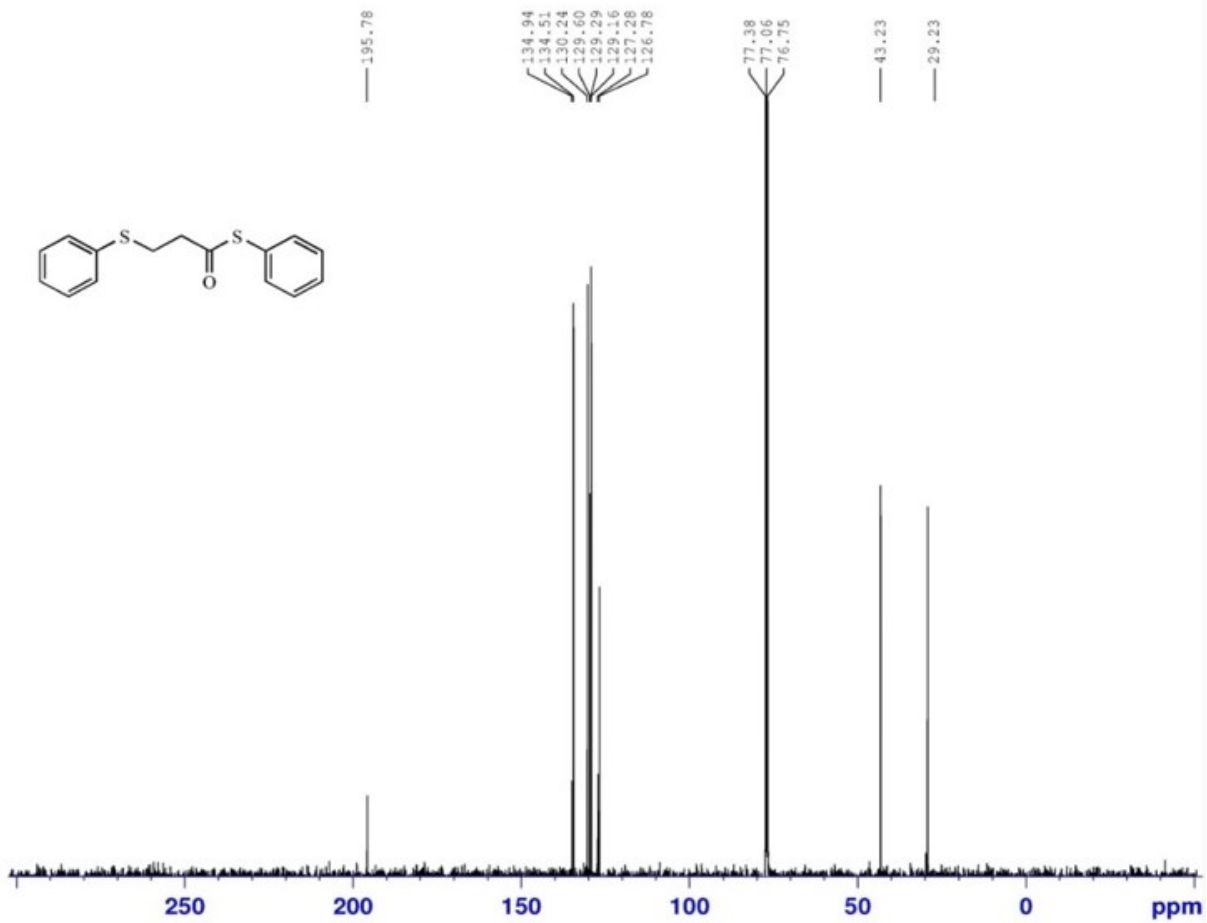

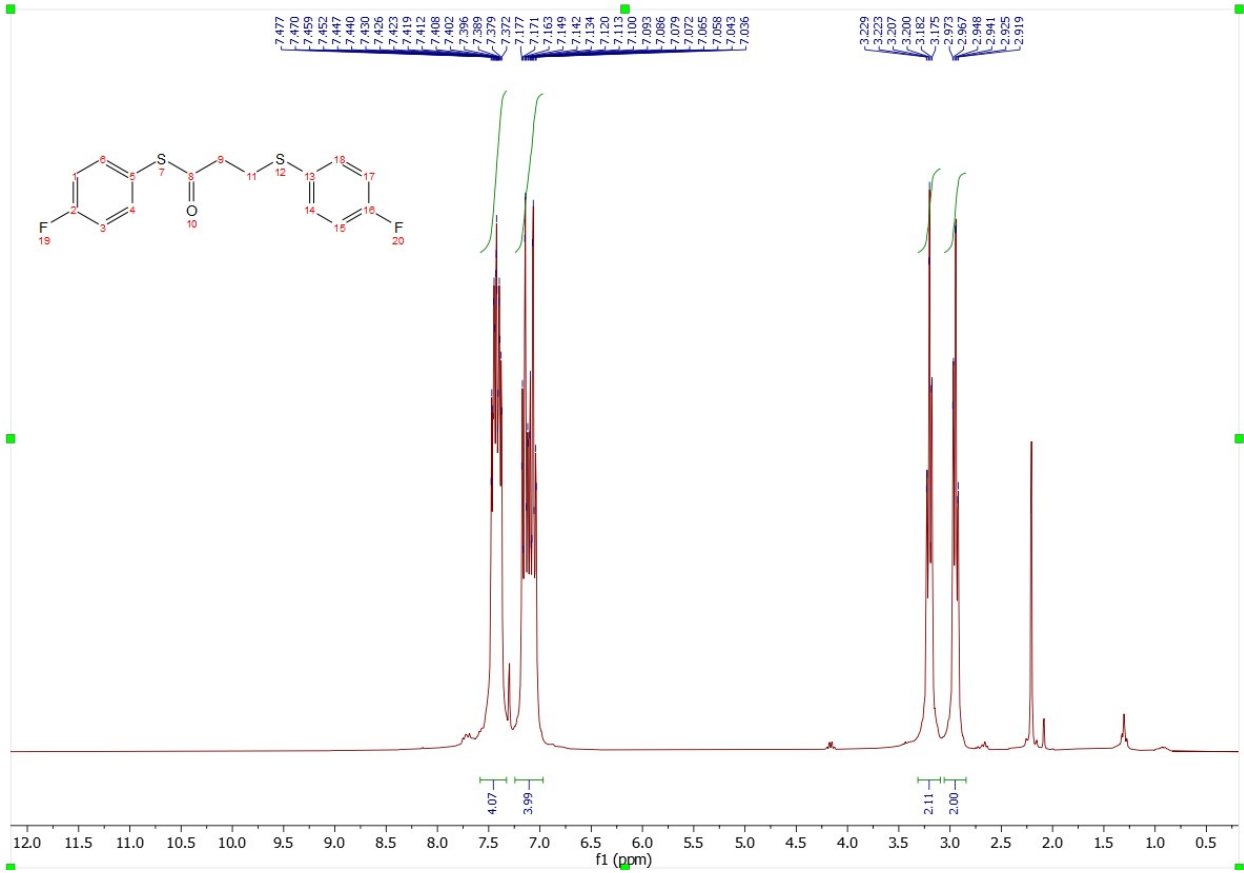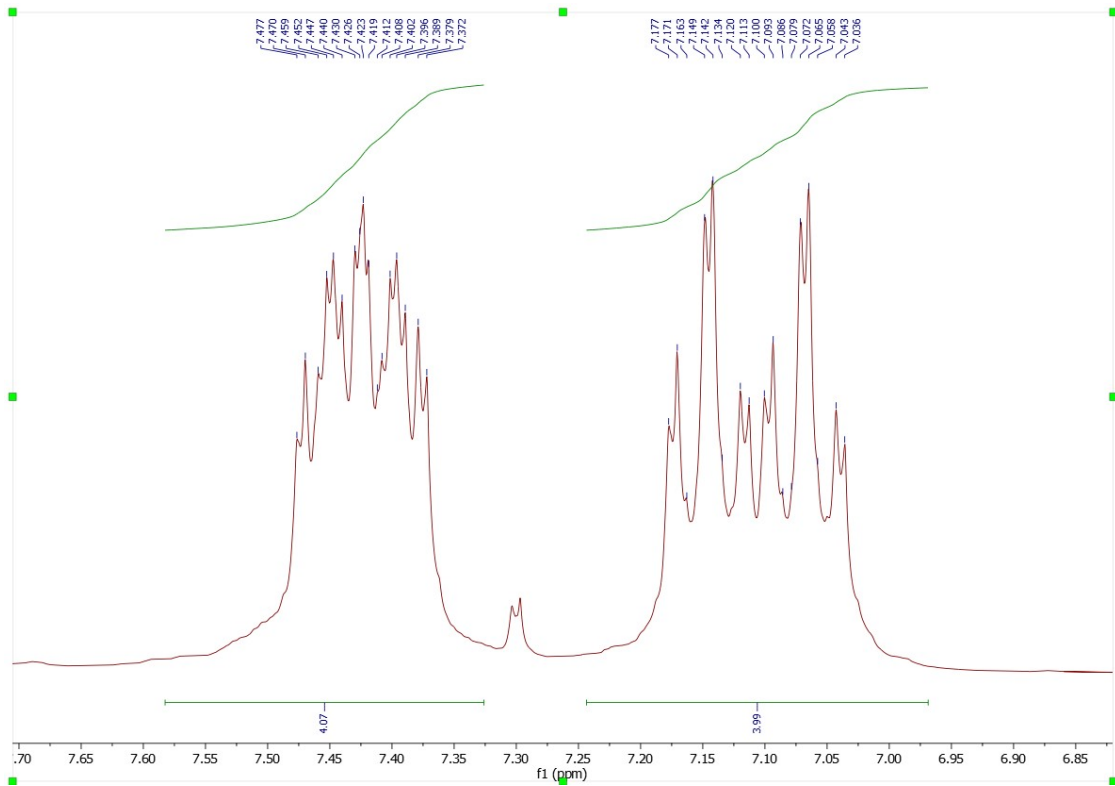

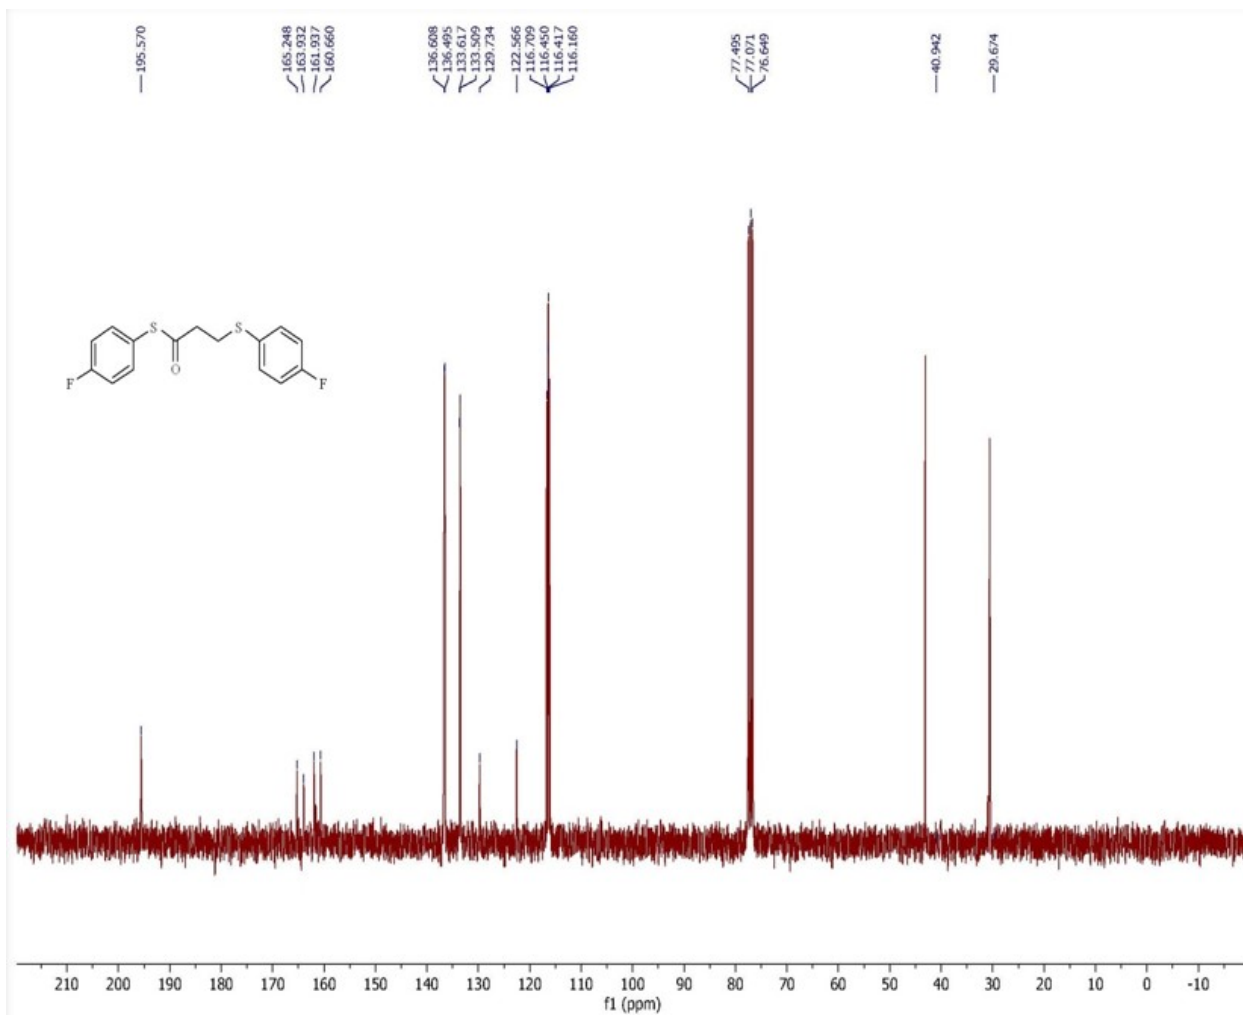

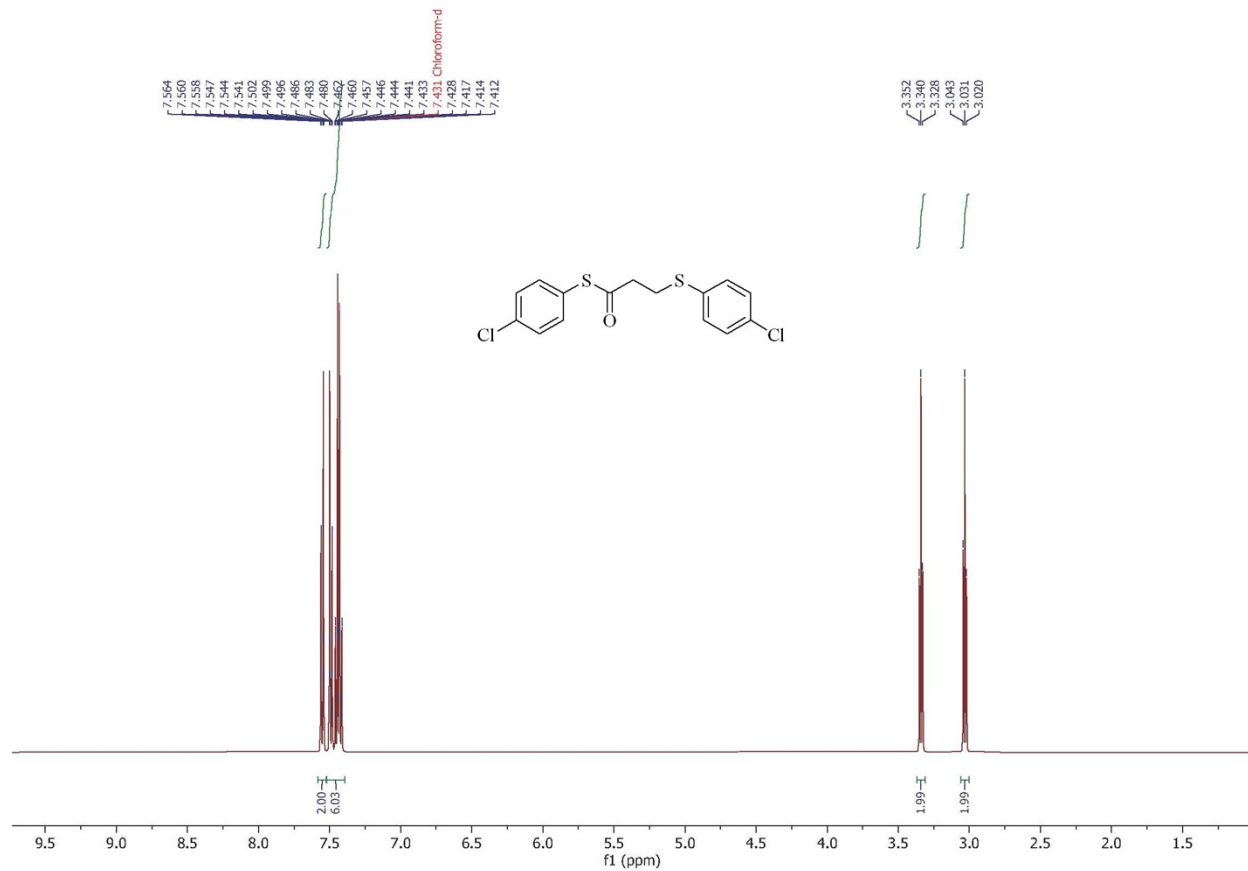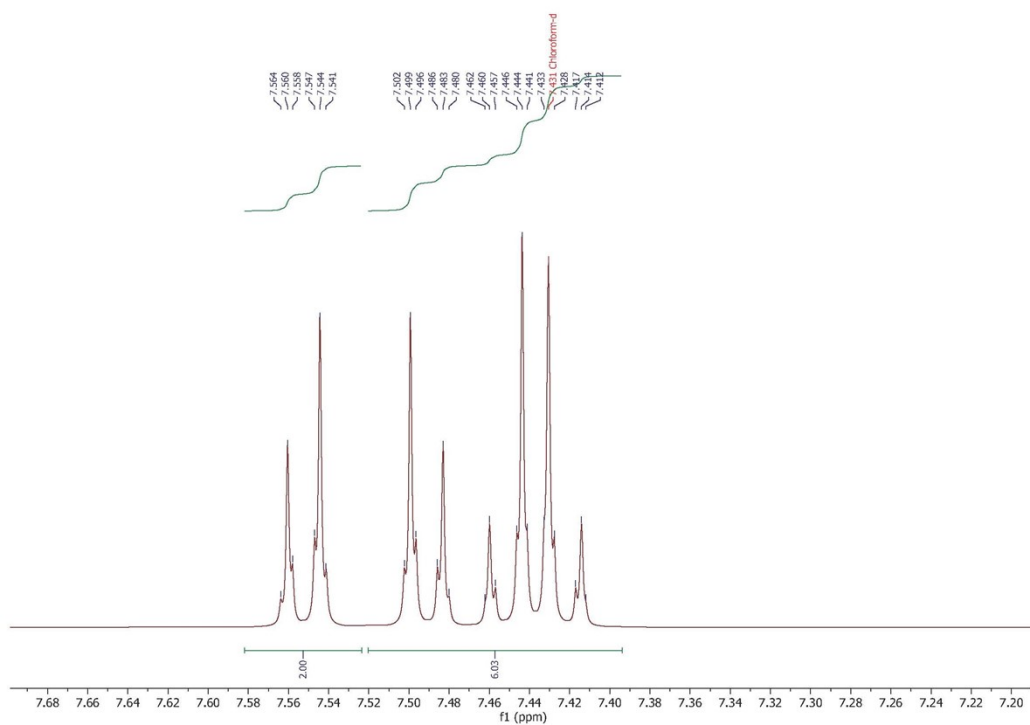

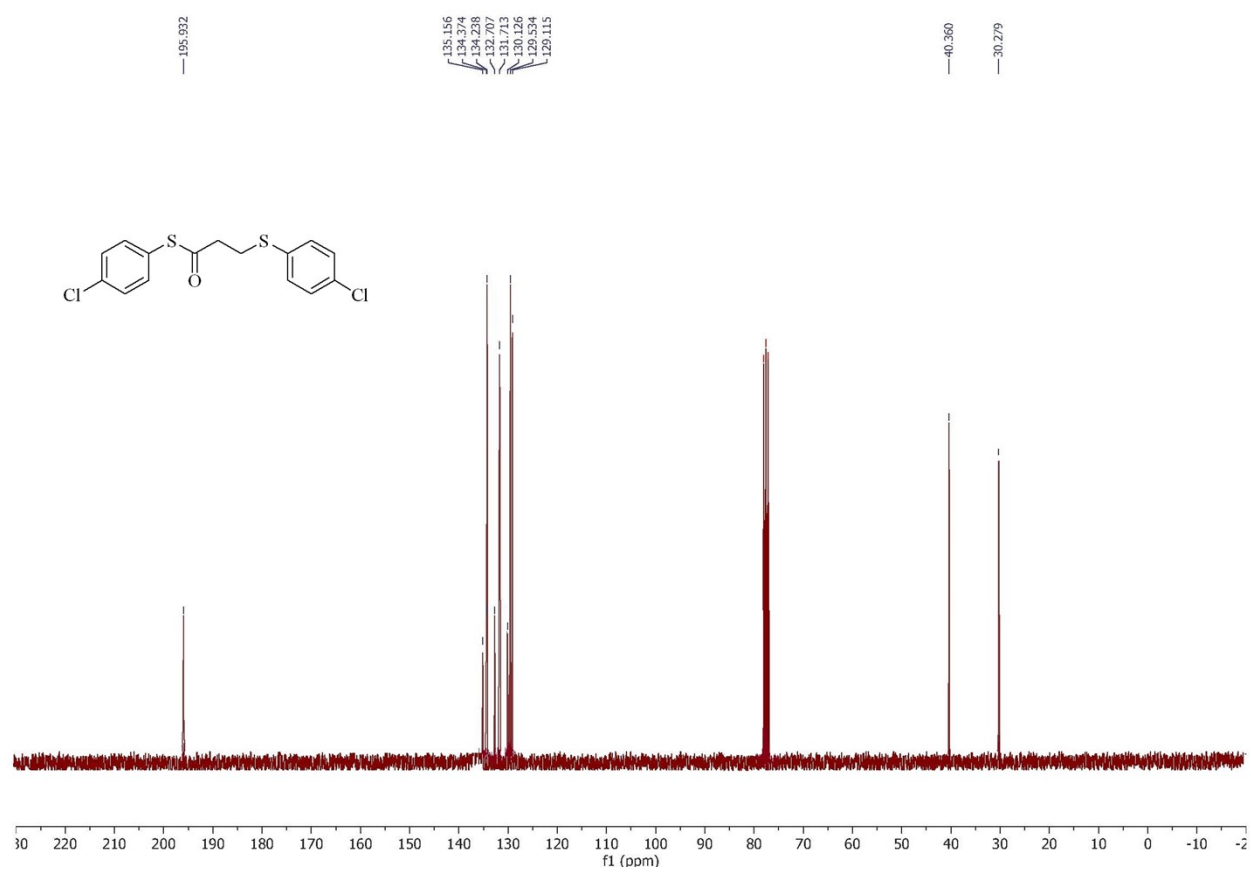

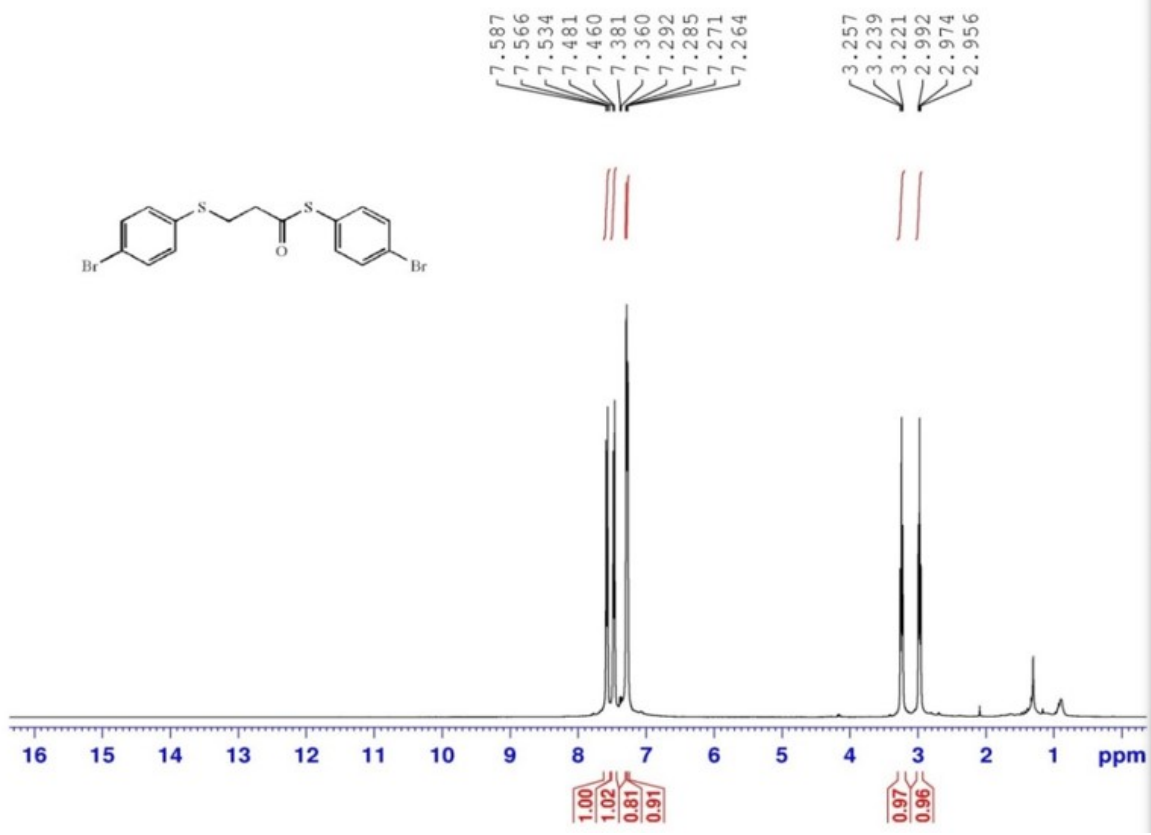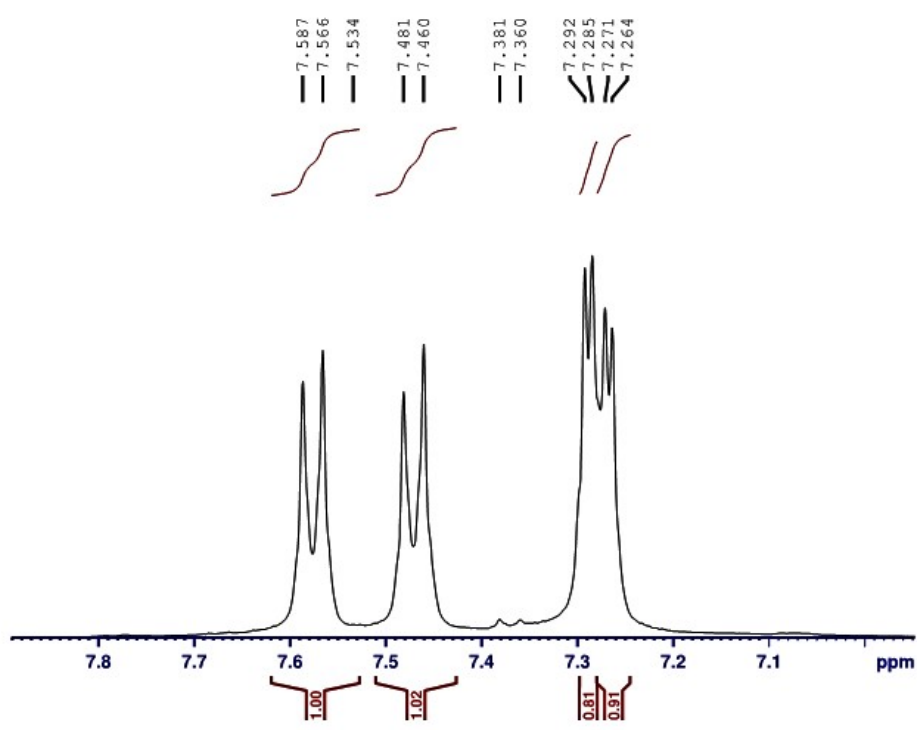



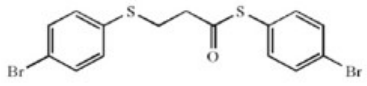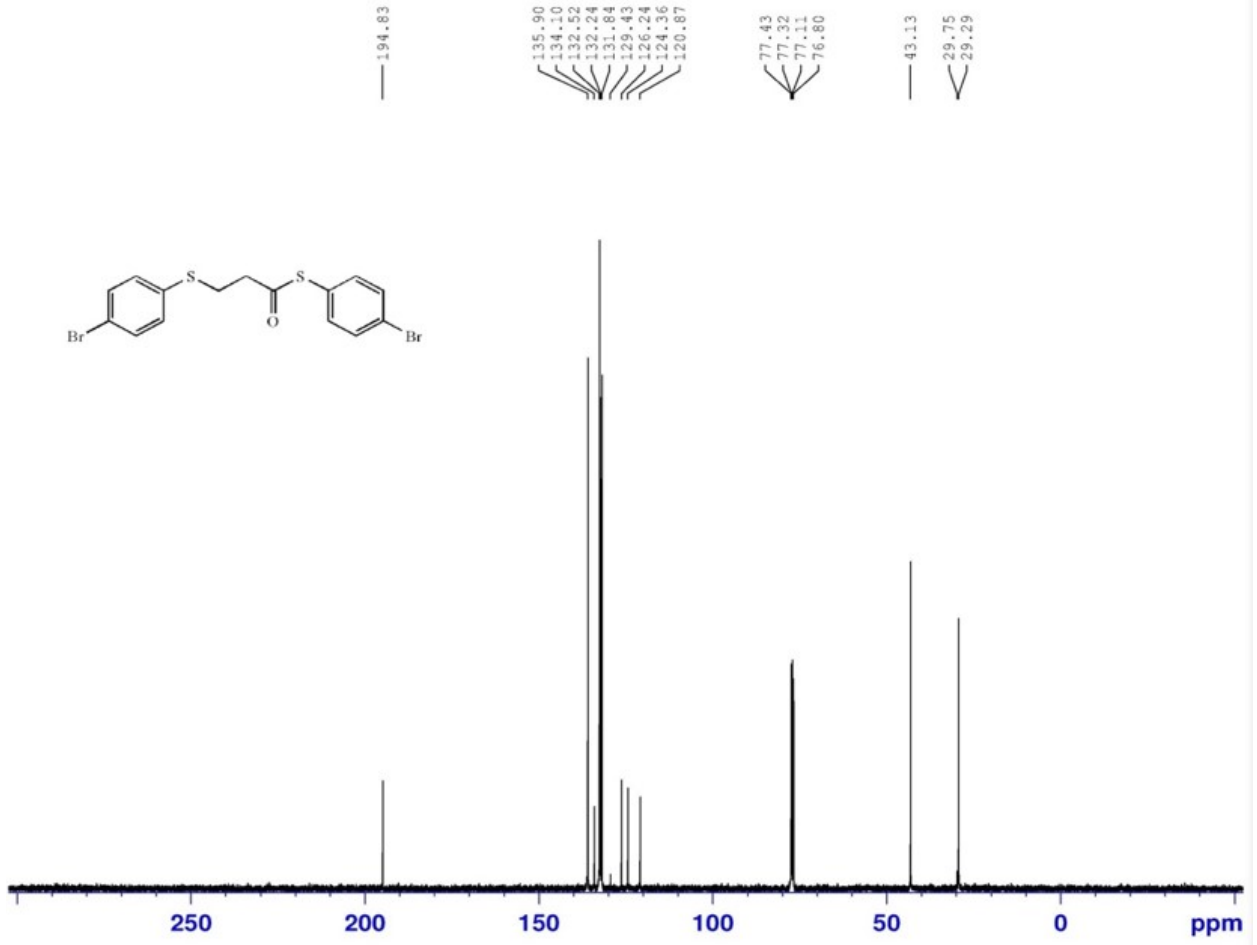

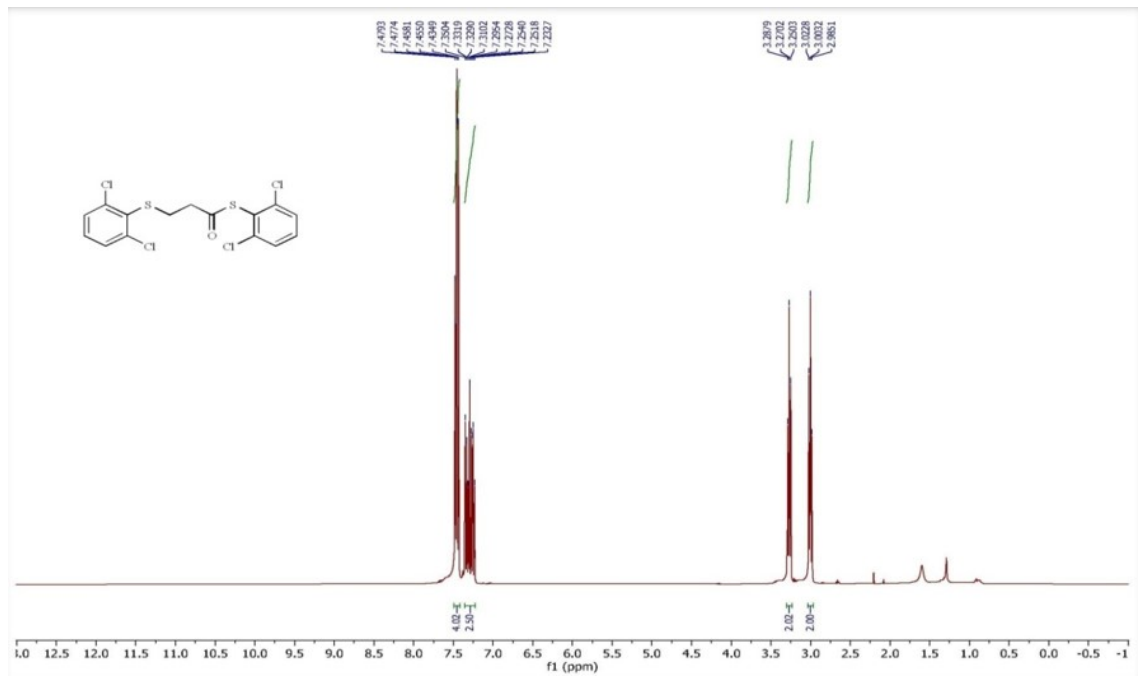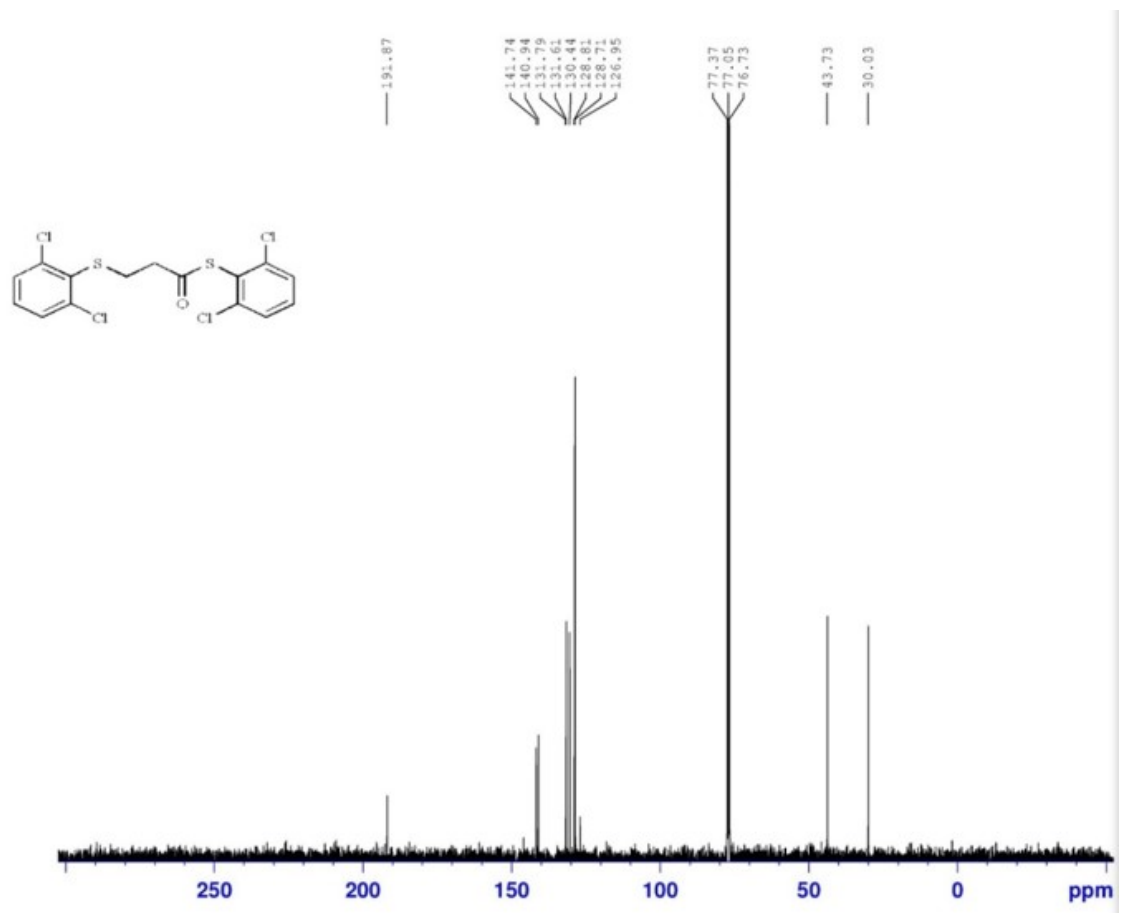

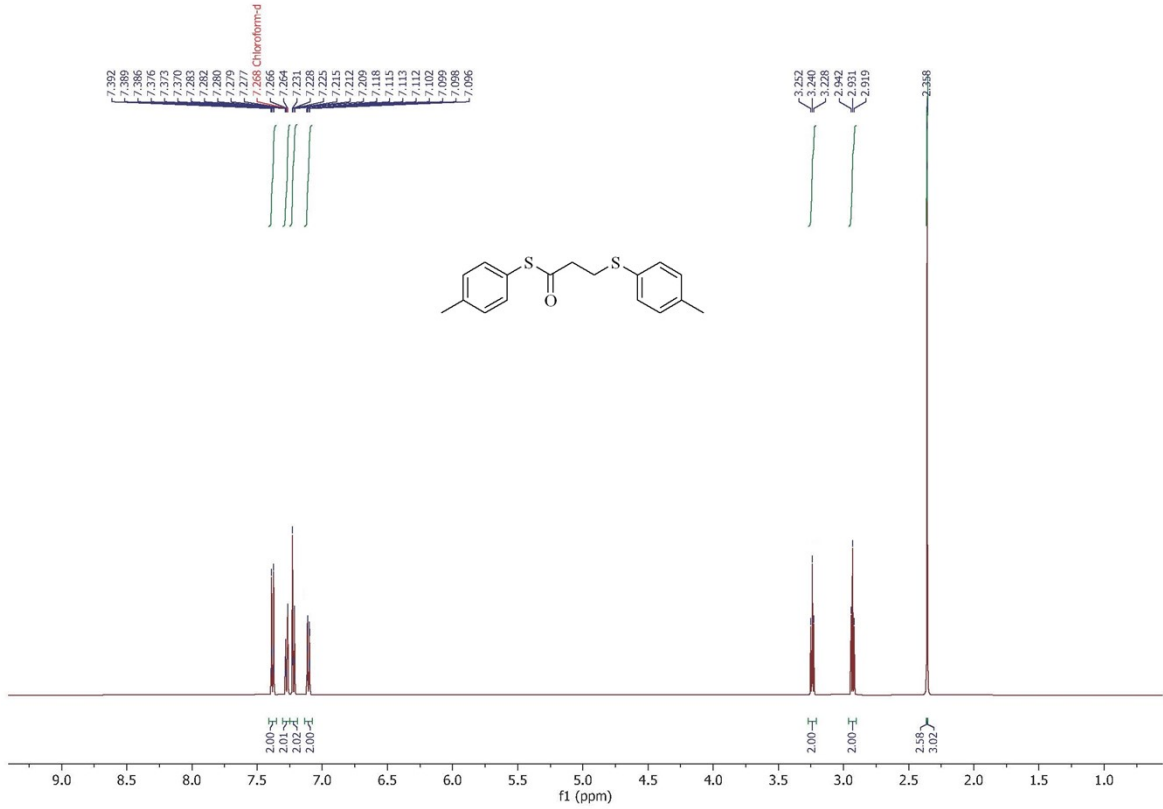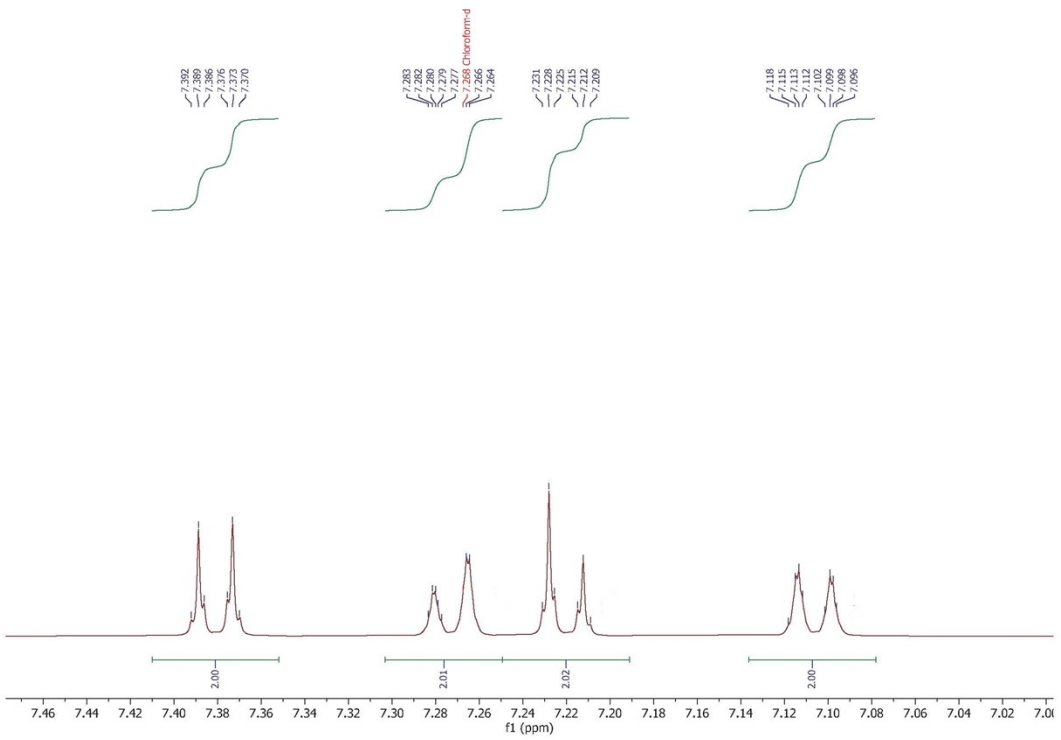

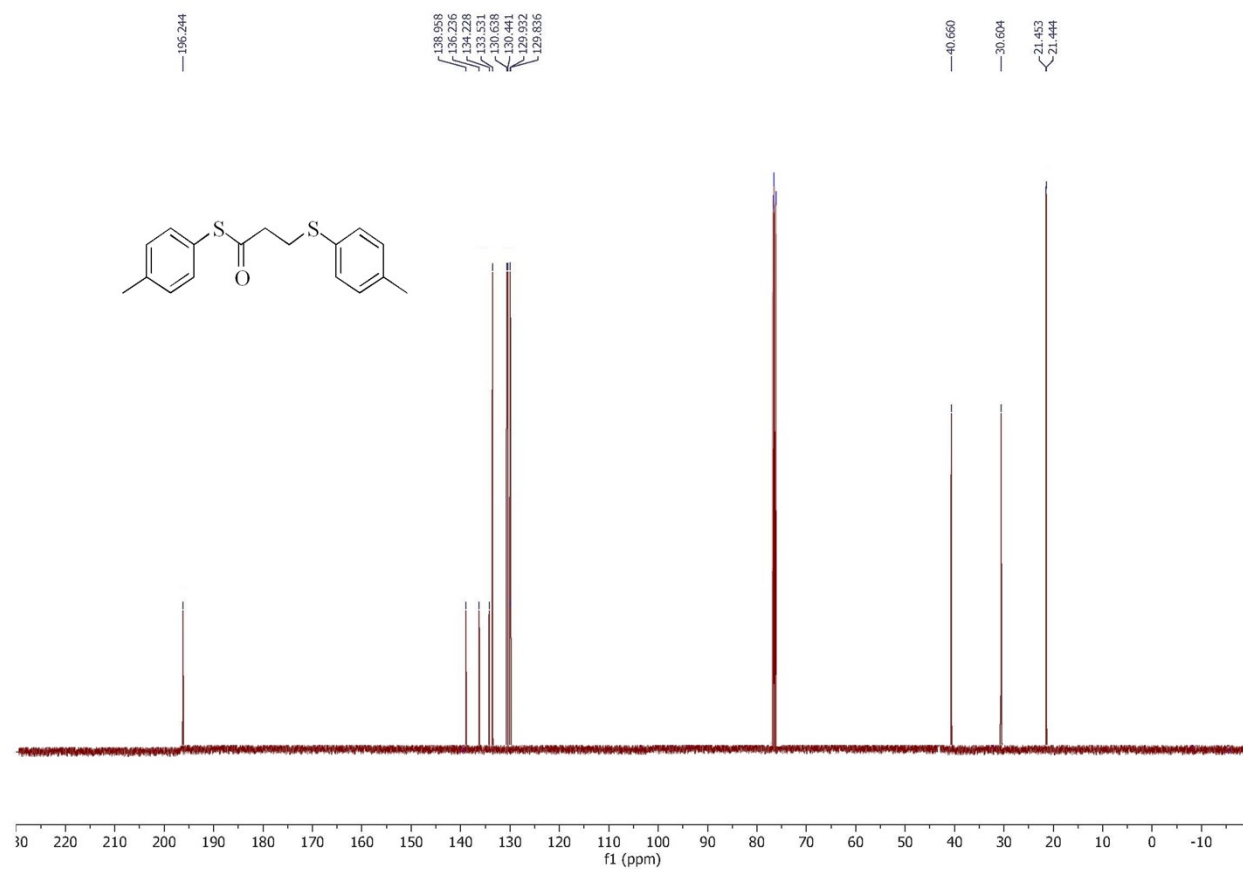

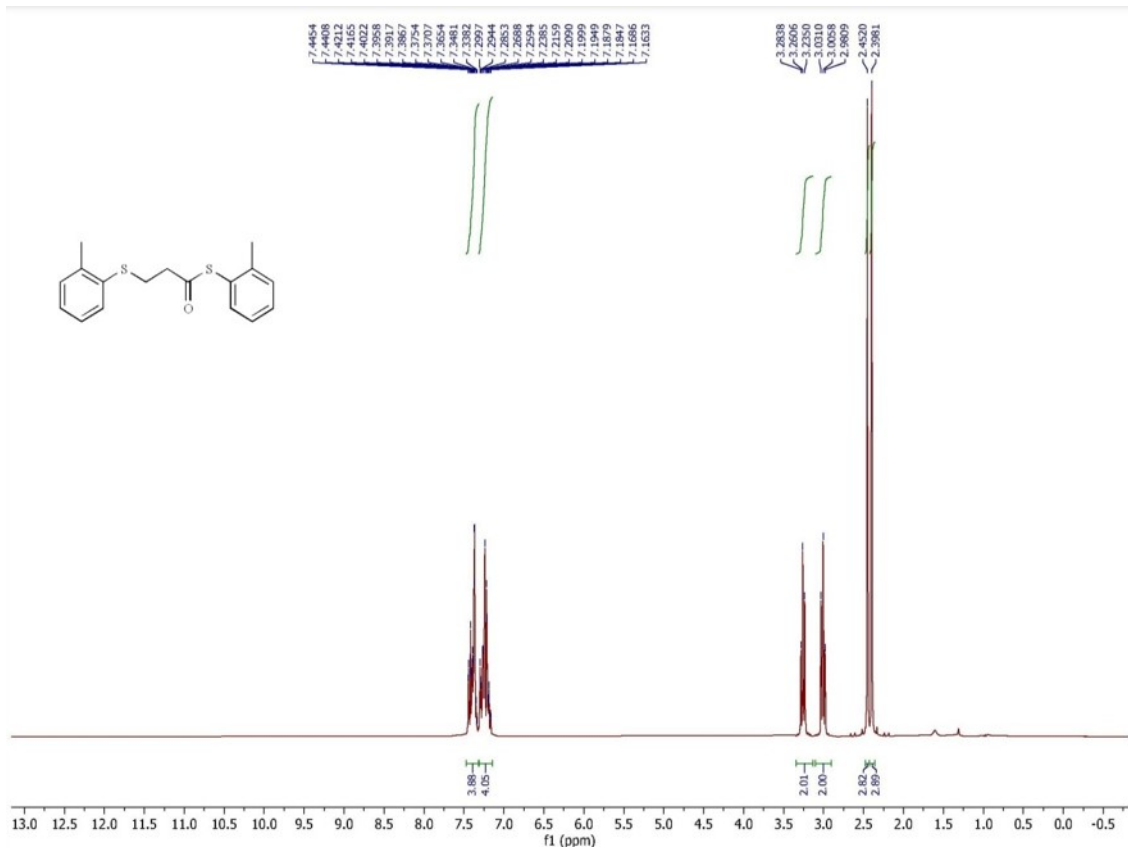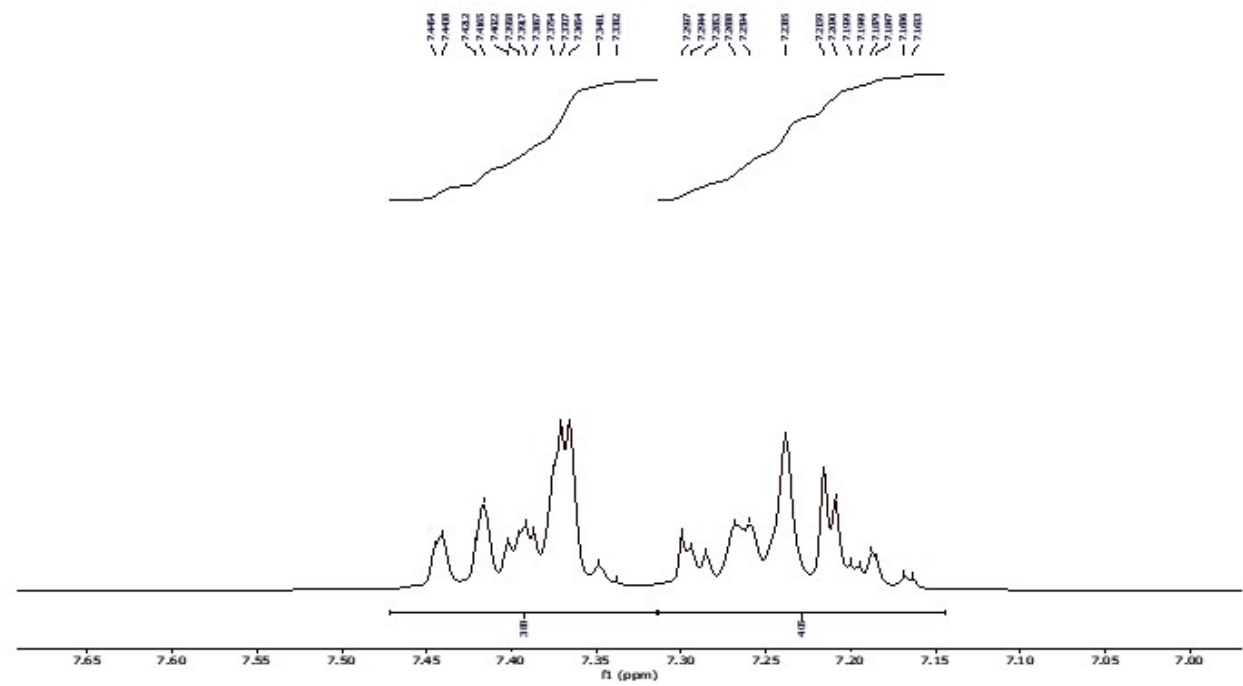

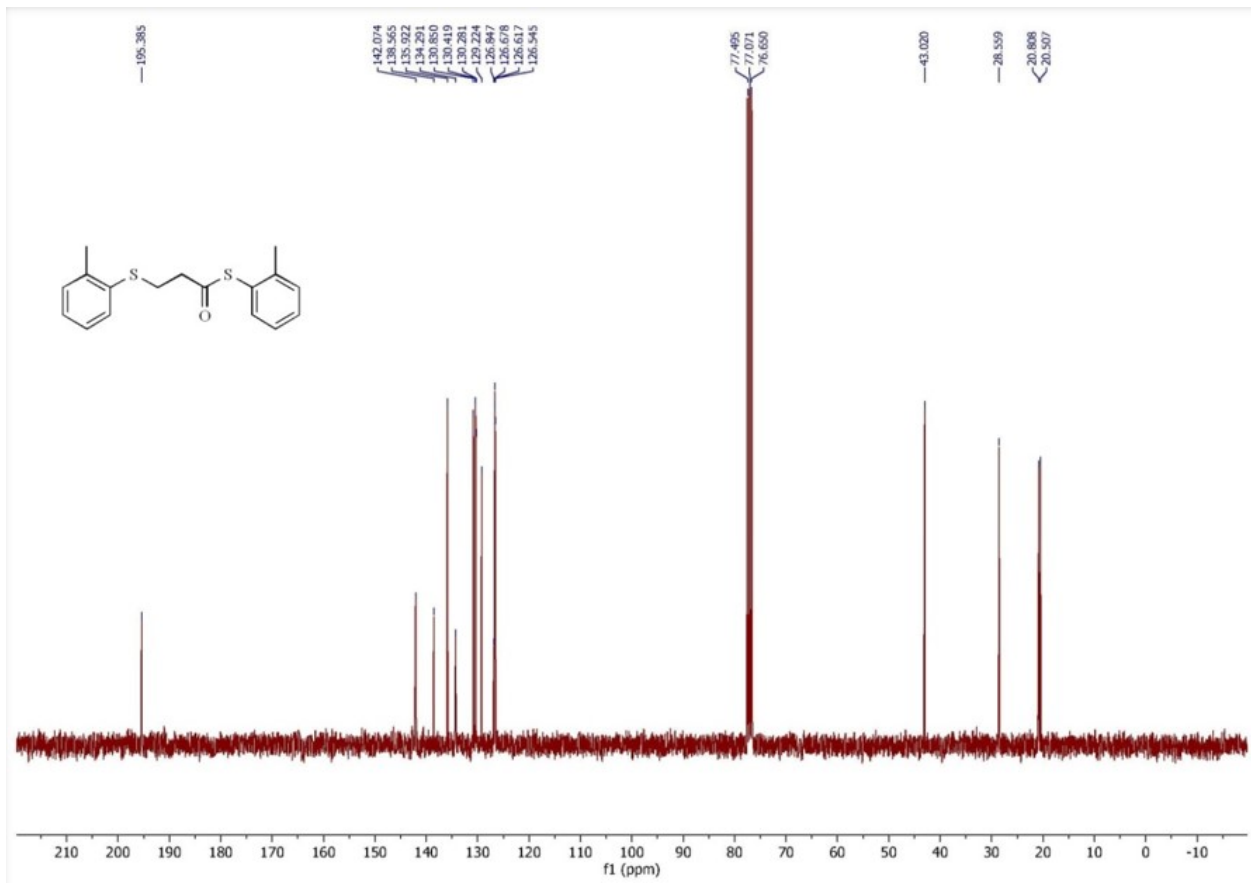



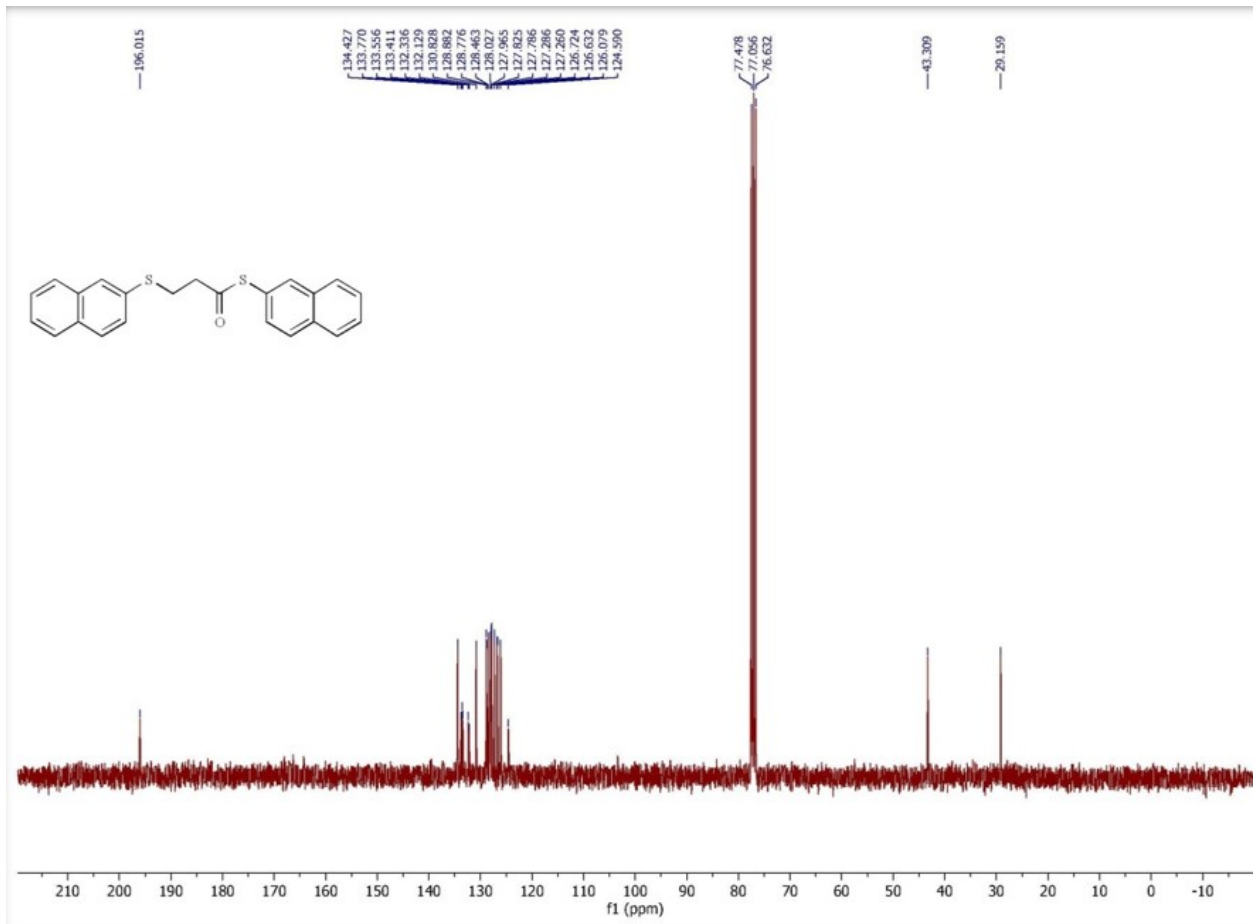

Supplement: d3ra00294b1.pdf [file d3ra00294b1.pdf]
